# Supplementary material for: Synthesis of Distinct Iron Oxide Nanomaterial Shapes Using Lyotropic Liquid Crystal Solvents
Source: MDPI journal article supplement (doi:10.3390/nano7080211), 2017-08-02
Supplement: s1 [file s1]

# Supplementary Information

for

## Synthesis of Distinct Iron Oxide Nanomaterial Shapes using Lyotropic Liquid Crystal Solvents

by

*Seyyed Muhammad Salili, Matthew Worden, Ahlam Nemati, Donald W. Miller and Torsten Hegmann\**

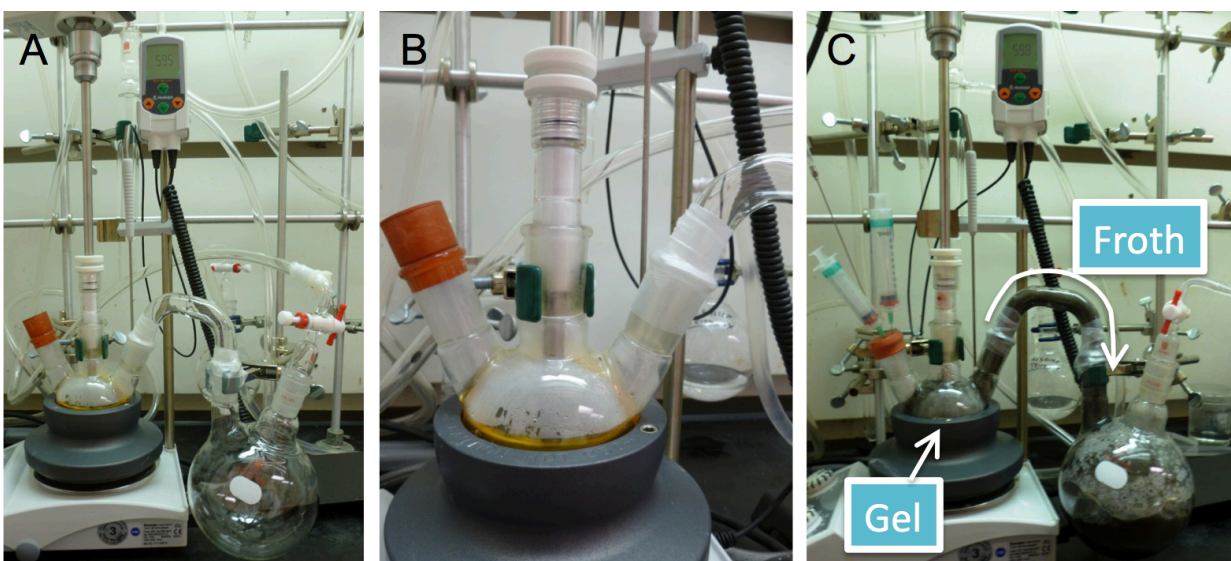

**Figure S1.** Photographs (A) and (B) show the reaction setup and (C) the reaction progress: (A, B) bulk LLC phase charged with Fe(III) precursor solution, (C) after injection of  $\text{NaBH}_4$  solution. The formation of IO nanomaterials is almost instantaneous as indicated by the color change and the formation of froth that is collected in a separate flask.
